# Supplementary material for: Evaluating Landscape Options for Corridor Restoration between Giant Panda Reserves
Source: PLoS One. 2014 Aug 18;9(8):e105086. doi: 10.1371/journal.pone.0105086 (PMC4136856; doi:10.1371/journal.pone.0105086)
Supplement: Table S3 — Sign transect dataset surveyed by the SFD. The sign transect dataset that was collected by the Shanxi Forestry Department (SFD) was used to validate our occupancy model. (XLSX) [file pone.0105086.s003.xlsx]

## Sheet: S3_SFD_panda_XY
Id	Panda_presence	X	Y
1	0	722503	3737262
2	0	722984	3736496
3	0	719713	3737641
4	0	719865	3739087
5	0	718442	3739485
6	0	718331	3737276
7	0	718116	3734497
8	0	718649	3735508
9	0	717413	3732817
10	0	716816	3734579
11	0	724761	3739756
12	0	725472	3737110
13	0	727257	3736153
14	0	724619	3733982
15	0	723244	3733284
16	0	722750	3734604
17	0	721373	3734017
18	0	720647	3733335
19	0	719532	3733420
20	0	719682	3734977
21	0	721249	3735346
22	0	724208	3739632
23	0	723282	3739610
24	0	726518	3736025
25	0	717822	3739262
26	0	728310	3738620
27	0	729218	3739418
28	0	730891	3739237
29	0	731364	3738804
30	0	731863	3737374
31	0	732609	3737170
32	0	729703	3734658
33	0	723842	3731523
34	0	730666	3744669
35	0	733406	3746290
36	0	733898	3748854
37	0	734860	3743662
38	0	727553	3743152
39	0	728452	3746683
40	0	726805	3747351
41	0	726011	3749552
42	0	732273	3747150
43	0	736177	3746580
44	0	736229	3744473
45	0	737389	3746277
46	0	738107	3747183
47	0	736150	3747689
48	0	729893	3750328
49	0	718450	3732064
50	0	717668	3733821
51	0	724795	3738314
52	0	726971	3740363
53	0	725783	3739669
54	0	726564	3741907
55	0	722469	3738704
56	0	727034	3733817
57	0	728940	3735527
58	0	730939	3737240
59	0	731336	3743798
60	0	730572	3748551
61	0	739226	3746878
62	0	741184	3746373
63	0	737289	3750270
64	0	736303	3745251
65	0	734252	3745756
66	0	738263	3744634
67	0	732324	3741269
68	0	732809	3740393
69	0	734214	3743535
70	0	733783	3739169
71	0	731248	3739800
72	0	735020	3744913
73	0	734732	3744301
74	0	725927	3750722
75	0	724409	3739200
76	0	724574	3740392
77	0	725278	3737405
78	0	725437	3736551
79	0	725197	3736182
80	0	725122	3735850
81	0	727018	3737314
82	0	726894	3736717
83	0	728326	3737940
84	0	728096	3737208
85	0	727616	3738814
86	0	730373	3737659
87	0	729081	3739806
88	0	729364	3740018
89	0	729359	3740836
90	0	730034	3740291
91	0	739881	3744015
92	0	738484	3743451
93	0	738321	3742919
94	0	743541	3744002
95	0	744072	3743910
96	0	722422	3740264
97	0	721648	3737500
98	0	721673	3736444
99	0	718872	3738520
100	0	719212	3738987
101	0	718753	3737181
102	0	718838	3736874
103	1	751111	3734875
104	1	750449	3728095
105	1	750020	3730299
106	1	750127	3734483
107	1	750153	3734658
108	1	751219	3734046
109	1	709729	3735599
110	1	711000	3739573
111	1	713424	3733942
112	1	729149	3734187
113	1	721267	3738576
114	1	732662	3735986
115	1	741768	3740720
116	1	744795	3742300
117	1	736827	3747829
118	1	744003	3747342
119	1	737542	3738083
120	1	715878	3741745
121	1	743872	3739958
122	1	740659	3737917
123	1	717430	3742435
124	1	717496	3742595
125	1	717142	3742524
126	1	739269	3736591
127	1	718061	3743663
128	1	733628	3740266
129	1	743766	3737174
130	1	720462	3741756
131	1	711931	3734148
132	1	716665	3737774
133	1	715910	3739206
134	1	716341	3738593
135	1	716491	3741676
136	1	716080	3741836
137	1	736110	3735623
138	1	717148	3742632
139	1	738813	3739902
140	1	745022	3751052
141	1	737792	3750769
142	1	750568	3747622
143	1	740746	3732253
144	1	743930	3730668
145	1	740111	3731083
146	1	741182	3728130
147	1	747213	3722159
148	1	747203	3721469
149	1	729152	3727848
150	1	744100	3732912
151	1	740331	3728111
152	1	739777	3726308
153	1	744463	3722675
154	1	739493	3729884
155	1	738237	3729668
156	1	741997	3729754
157	1	738862	3728568
158	1	737801	3729931
159	1	736903	3731873
160	1	739095	3727819
161	1	751208	3720424
162	1	751369	3720116
163	1	750277	3721913
164	1	750575	3724979
165	1	742241	3733477
166	1	741793	3729744
167	1	748925	3724081
168	1	751336	3722052
169	1	745259	3732337
170	1	747107	3727166
171	1	746978	3727375
172	1	721190	3724781
173	1	746890	3731610
174	1	745476	3731490
175	1	714454	3728963
176	1	741539	3727070
177	1	741592	3727227
178	1	741900	3727697
179	1	741849	3727522
180	1	746987	3729403
181	1	744342	3729325
182	1	745266	3726074
183	1	745384	3731796
184	1	740933	3724371
185	1	736205	3727322
186	1	733150	3727561
187	1	739918	3723902
188	1	736851	3726692
189	1	726947	3728685
190	1	731862	3729021
191	1	731749	3729046
192	1	739982	3722895
193	1	740448	3722223
194	1	740680	3721580
195	1	744967	3722651
196	1	742972	3719113
197	1	728140	3723782
198	1	731369	3729263
199	1	743309	3726499
200	1	743458	3726727
201	1	743045	3727567
202	1	742578	3727435
203	1	735574	3727948
204	1	748242	3742756
205	1	751333	3745683
206	1	749198	3736760
207	1	750719	3750697
208	1	750608	3739499
209	1	747490	3737842
210	1	747613	3739423
211	1	750994	3746007
212	1	750977	3747894
213	1	747658	3739911
214	1	746824	3739982
215	1	748470	3741116
216	1	750719	3737099

## Sheet: Explanations
Giant panda distribution data colleted by the Shaanxi Forestry Department (SFD): 1. Projection: UTM-48N 2. X: longitude of panda signs 3. Y: latitude 4. 1: detedted giant panda presence 5. 0: no giant panda presence 6. Used for model validation
